# Supplementary material for: Predictability of rainfall induced-landslides: The case study of Western Himalayan Region
Source: Copernicus journal article supplement (doi:10.5194/egusphere-2022-243), 2022-06-03
Supplement: Supplementary file 1 [file egusphere-2022-243-supplement.pdf]

## Supplementary Information for

### Predictability of rainfall induced-landslides: The case study of Western Himalayan Region

Swadhi Ritumbara Das<sup>1</sup>, Poulomi Ganguli<sup>1,\*</sup>

<sup>1</sup>Agricultural and Food engineering department, Indian Institute of Technology Kharagpur, Kharagpur, India

\*Correspondence to: Poulomi Ganguli ([pganguli@agfe.iitkgp.ac.in](mailto:pganguli@agfe.iitkgp.ac.in))

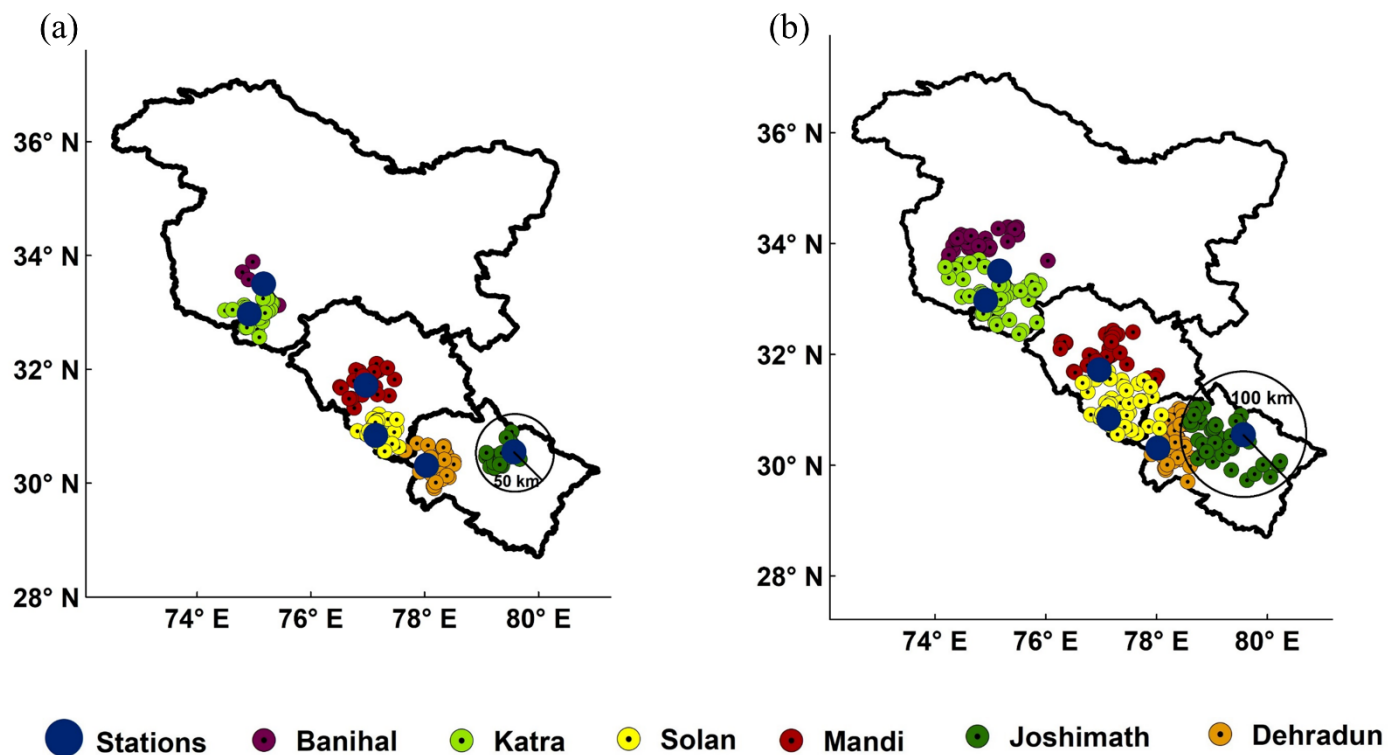

**Fig. S1.** Landslide events within (a) 50 km and (b) 100 km radius of selected sites.
